# Supplementary material for: Colorimetric assay based on NiCo2S4@N,S-rGO nanozyme for sensitive detection of H2O2 and glucose in serum and urine samples
Source: Royal Society of Chemistry journal article supplement (doi:10.1039/d2ra03444a), 2022-01-01
Supplement: d2ra03444a1.pdf [file d2ra03444a1.pdf]

Electronic Supplementary Material

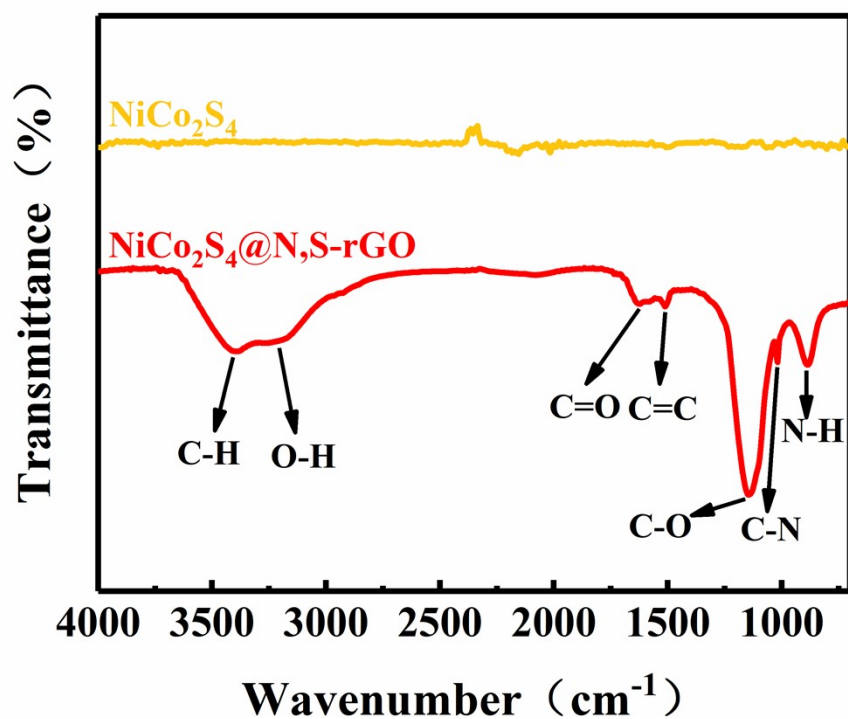

Fig. S1. FT-IR spectra of the  $\text{NiCo}_2\text{S}_4$  and  $\text{NiCo}_2\text{S}_4@\text{N,S-rGO}$

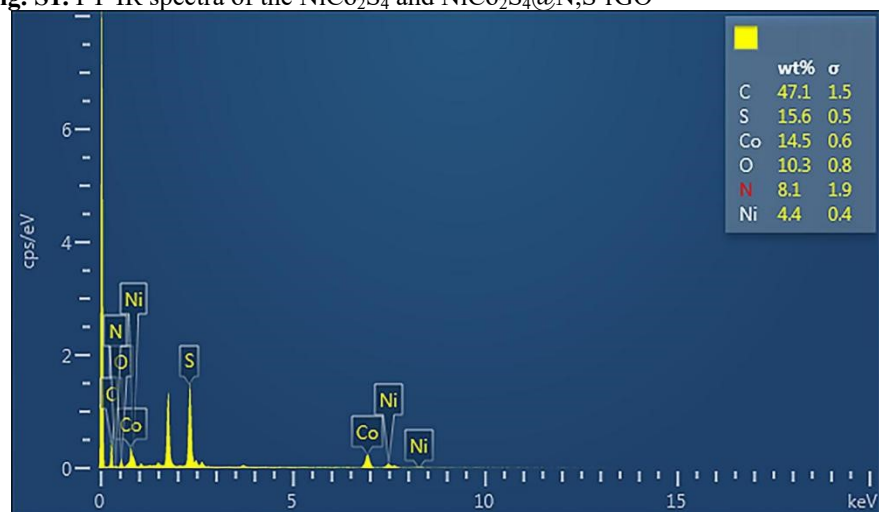

Fig. S2. EDS spectra of the  $\text{NiCo}_2\text{S}_4$  and  $\text{NiCo}_2\text{S}_4@\text{N,S-rGO}$

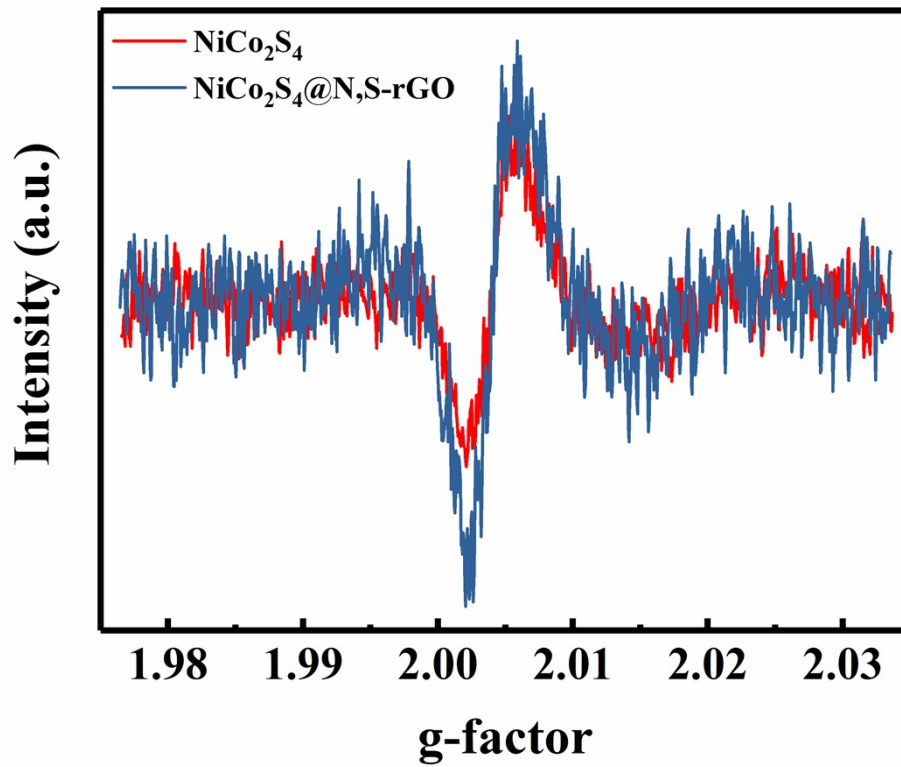

Fig. S3. EPR spectra of the  $\text{NiCo}_2\text{S}_4@\text{N,S-rGO}$  and  $\text{NiCo}_2\text{S}_4$
